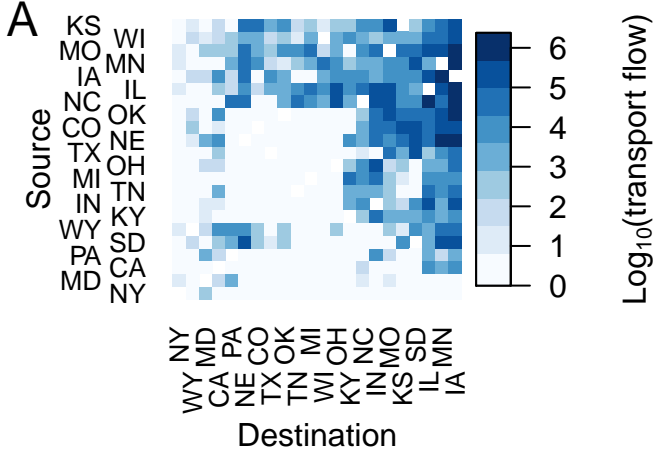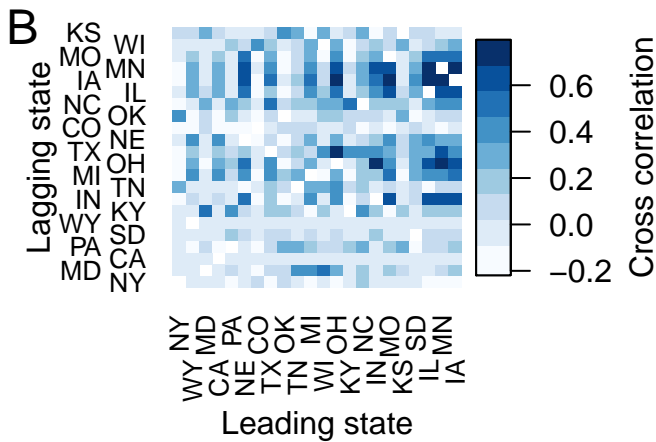

Source: https://www.biorxiv.org/content/biorxiv/suppl/2015/03/27/017178.DC1/017178-7.pdf
